# Supplementary material for: Cationic azacryptands as selective three-way DNA junction binding agents
Source: Royal Society of Chemistry journal article supplement (doi:10.1039/c4ob01846j), 2014-10-15
Supplement: c4ob01846j1.pdf [file c4ob01846j1.pdf]

## Cationic azacryptands as selective three-way DNA junction binding agents

Jana Novotna,<sup>a,b</sup> Aurelien Laguerre,<sup>a</sup> Anton Granzhan,<sup>c</sup> Marc Pirrotta,<sup>a</sup>  
Marie-Paule Teulade-Fichou<sup>c</sup> and David Monchaud<sup>a,\*</sup>

<sup>a</sup> Institute of Molecular Chemistry, University of Dijon, ICMUB CNRS UMR6302, Dijon, France.

<sup>b</sup> Department of Analytical Chemistry, Institute of Chemical Technology, Prague, Czech Republic.

<sup>c</sup> Institut Curie, Université Paris Sud, CNRS UMR176, Orsay, France.

\*E-mail: david.monchaud@u-bourgogne.fr

|                                                  |         |
|--------------------------------------------------|---------|
| Part 1. Chemistry.....                           | Page 01 |
| Part 2. Oligonucleotides.....                    | Page 03 |
| Part 3. FRET-melting assay.....                  | Page 04 |
| Part 4. Gel electrophoresis.....                 | Page 07 |
| Part 5. Circular dichroism & UV spectroscopies.. | Page 07 |
| Part 6. Fluorescence and FID assay.....          | Page 08 |
| Part 7. Cell culture and MTT assay.....          | Page 10 |

### Part 1. Chemistry.

**General remarks.** Aromatic dialdehydes were prepared according to the published procedures (*cf.* A. Granzhan, E. Largy, N. Saettel, M.-P. Teulade-Fichou, *Chem. Eur. J.* **2010**, *16*, 878–889). NMR spectra were measured with a Bruker Avance 300 (<sup>1</sup>H: 300 MHz, <sup>13</sup>C: 75 MHz) spectrometer at 25 °C; chemical shifts (δ) are given in ppm. The multiplicities of <sup>13</sup>C NMR signals were determined by means of DEPT-135 experiments. Melting points were determined in open-end capillaries with a digital melting point instrument (SMP30, Stuart). Elemental microanalyses of the new compounds were performed by the *Service de Microanalyse*, CNRS-ICSN, Gif-sur-Yvette, France. Mass spectra (ESI in positive-ion mode) were recorded with a Waters ZQ instrument (source voltage: 75 kV).

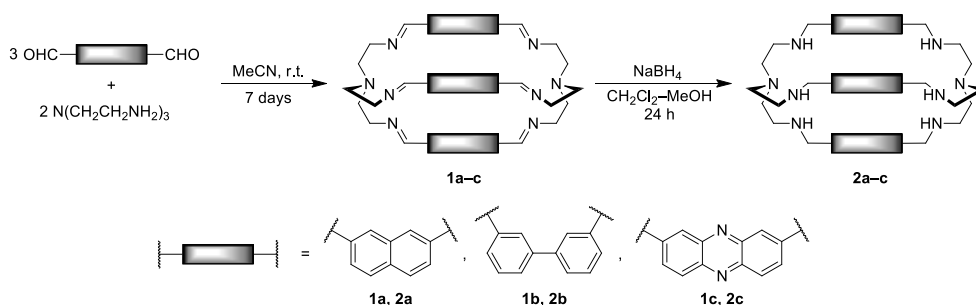

**General procedure for synthesis of macrobicyclic compounds.** 1) A solution of dialdehyde (3.00 mmol) in MeCN (for **1a** and **1b**: 150 mL) or 1:1 (v/v) MeCN–CH<sub>2</sub>Cl<sub>2</sub> (for **1c**: 300 mL) was added dropwise, under argon, to a vigorously stirred solution of tris(2-aminoethyl)amine (2.00 mmol) in

MeCN (100 mL). The reaction mixture was stirred at room temperature for 7 days and then concentrated, in vacuo, to a half of its initial volume. The precipitated solid was collected, thoroughly washed with MeCN and dried in vacuo, to give the hexamine intermediate (**1a–c**) which was sufficiently pure and used in the next step without characterization. 2) Sodium borohydride (10 mmol) was added to a stirred suspension of **1a–c** (0.5 mmol) in a mixture of CH<sub>2</sub>Cl<sub>2</sub> (30 mL) and MeOH (20 mL). After stirring for 24 h at room temperature, aq. NaOH (1 M, 20 mL) was added, the organic phase was separated, and the aqueous phase was extracted with chlorophorm (3 × 20 mL). The combined organic phases were washed with satd. aq. Na<sub>2</sub>CO<sub>3</sub> (20 mL), dried over K<sub>2</sub>CO<sub>3</sub>, and the solvent was removed in vacuo, to give the crude macrobicyclic **2a–c**. Compounds **2a** and **2b** were isolated and characterized as hydrochloride salts: the crude product was dissolved in 1,4-dioxane (20 mL), treated with excess HCl (4 M in 1,4-dioxane), the volatiles were removed in vacuo, and the residue was recrystallized in water, to give **2a × 6 HCl** or **2b × 7 HCl**, respectively, as analytically pure crystalline solids. Compound **2c** was obtained in analytically pure form after purification by flash chromatography (SiO<sub>2</sub>, eluent: CH<sub>2</sub>Cl<sub>2</sub>–MeOH–aq. NH<sub>4</sub>OH, 80:20:1 to 80:20:4), followed by recrystallization from pyridine.

1,4,8,11,14,18,23,27-Octaaza-6,16,25(2,7)-trinaphthalenabicyclo[9.9.9]nonacosaphane hexahydrochloride (**2a × 6 HCl**, **2,7-TrisNP × 6 HCl**): yield 31%; colorless needles, m.p. >260 °C; <sup>1</sup>H NMR (0.01 M DCl in D<sub>2</sub>O): δ = 2.89 (m, 2H), 3.34 (m, 2H), 7.65 (d, *J* = 8.5 Hz, 1H), 7.78 (s, 1H), 8.01 (d, *J* = 8.5 Hz, 1H); <sup>13</sup>C NMR (0.01 M DCl in D<sub>2</sub>O): δ = 46.3 (CH<sub>2</sub>), 51.1 (CH<sub>2</sub>), 52.3 (CH<sub>2</sub>), 128.5 (CH), 129.4 (C<sub>q</sub>), 129.5 (CH), 130.9 (CH), 133.0 (C<sub>q</sub>), 133.8 (C<sub>q</sub>); MS (ESI<sup>+</sup>): *m/z* (%) = 375.5 (46) [*M* + 2H]<sup>2+</sup>, 749.5 (100) [*M* + H]<sup>+</sup>, 785.5 (8) [*M* + HCl + H]<sup>+</sup>; anal. calc. (%) for C<sub>48</sub>H<sub>60</sub>N<sub>8</sub> × 6 HCl × 1.5 H<sub>2</sub>O (994.8): C, 57.95; H, 6.99; N, 11.26; Cl, 21.38; found: C, 57.88; H, 6.93; N, 11.05; Cl, 21.21.

1,4,9,12,15,20,25,30-Octaaza-6,7,17,18,27,28(1,3)-hexabenzenabicyclo[10.10.10]dotriacontaphane heptahydrochloride (**2b × 7HCl**, **3,3'-TrisBP × 7 HCl**): yield 21%; colorless needles, m.p. > 260 °C; <sup>1</sup>H NMR (0.01 M DCl in D<sub>2</sub>O): δ = 2.83 (t, *J* = 6 Hz, 2H), 3.16 (t, *J* = 6 Hz, 2H), 4.19 (s, 2H), 7.41 (d, *J* = 8 Hz, 1H), 7.49 (dd, *J* = 8 Hz, 1H), 7.75 (d, *J* = 8 Hz, 1H), 7.80 (s, 1H); <sup>13</sup>C NMR (0.01 M DCl in D<sub>2</sub>O): δ = 44.4 (CH<sub>2</sub>), 49.7 (CH<sub>2</sub>), 51.5 (CH<sub>2</sub>), 128.9 (CH), 129.1 (CH), 130.1 (CH), 130.7 (CH), 131.7 (C<sub>q</sub>), 141.0 (C<sub>q</sub>); MS (ESI<sup>+</sup>): *m/z* (%) = 414.5 (100) [*M* + 2H]<sup>2+</sup>, 827.5 (11) [*M* + H]<sup>+</sup>, 863.5 (22) [*M* + HCl + H]<sup>+</sup>; anal. calc. (%) for C<sub>54</sub>H<sub>66</sub>N<sub>8</sub> × 7 HCl (1082.4): C, 59.92; H, 6.80; N, 10.35; Cl, 22.93; found: C, 60.05; H, 6.81; N, 10.31; Cl, 22.99.

1,4,8,11,14,18,23,27-Octaaza-6,16,25(2,8)-triphenazinabicyclo[9.9.9]nonacosaphane (**2c**, **1,8-TrisPZ**): yield 26%; brown needles, m.p. 245–247 °C (dec.); <sup>1</sup>H NMR (CDCl<sub>3</sub>): δ = 2.43 (br s, 1H), 2.81 (t, *J* = 5 Hz, 2H), 3.00 (t, *J* = 5 Hz, 2H), 3.91 (s, 2H), 7.28 (br s, 2H), 7.51 (s, 1H); <sup>13</sup>C NMR (CDCl<sub>3</sub>): δ = 47.8 (CH<sub>2</sub>),

52.9 (CH<sub>2</sub>), 54.3 (CH<sub>2</sub>), 126.9 (CH), 127.9 (CH), 130.4 (CH), 141.0 (C<sub>q</sub>), 141.3 (C<sub>q</sub>), 141.7 (C<sub>q</sub>); MS (ESI<sup>+</sup>):  $m/z$  (%) = 905.8 (100) [M + H]<sup>+</sup>; anal. calc. (%) for C<sub>54</sub>H<sub>60</sub>N<sub>14</sub> (905.2): C, 71.65; H, 6.68; N, 21.66; found: C, 71.45; H, 6.86; N, 21.69.

## Part 2. Oligonucleotides.

**Sequences** (from 5' to 3'), extinction coefficient ( $\epsilon$ ) values expressed in M<sup>-1</sup>.cm<sup>-1</sup>

### Labeled DNA:

**fam-TWJ-tamra** ( $\epsilon$ : 435500): *fam*-ACTCTTCTCG-TTTTTT-CGAGAGCGAC-TTTTTT-GTCGCAGAGT-*tamra*

**fam-DS-tamra** ( $\epsilon$ : 258900): *fam*-TATAGCTATA-TTTTTT-TATAGCTATA-*tamra*

**fam-GQ-tamra (F21T)** ( $\epsilon$ : 268300): *fam*-GGGTTAGGGTTAGGGTTAGGG-*tamra*

### Unlabeled DNA:

**ds26** ( $\epsilon$ : 235200): CAATCGGATCGAATTCGATCCGATTG (*self-complementary sequence*)

**TG5T** ( $\epsilon$ : 67900): TGGGGGT

**PAGE TWJ-S1** ( $\epsilon$ : 131900): CGGAACGGCACTCG

**PAGE TWJ-S2** ( $\epsilon$ : 135200): CGAGTGCAGCGTGG

**PAGE TWJ-S3** ( $\epsilon$ : 118700): CCACGCTCGTTCCG

**CD TWJ-S1** ( $\epsilon$ : 196400): GGTGGCGAGAGCGACGATCC

**CD TWJ-S2** ( $\epsilon$ : 193800): GGATCGTCGCAGAGTTGACC

**CD TWJ-S3** ( $\epsilon$ : 173900): GGTCAACTCTTCTCGCCACC

**CD-melting TWJ** ( $\epsilon$ : 382200): ACTCTTCTCG-TTTTTT-CGAGAGCGAC-TTTTTT-GTCGCAGAGT

**Preparation of the oligonucleotide stock solutions.** The lyophilized strands are firstly diluted in deionized water (18.2 M $\Omega$ .cm resistivity) at 500 $\mu$ M for monomolecular and bimolecular DNA constitutive strands and at 1000 $\mu$ M for trimolecular and tetramolecular DNA constitutive strands. The actual concentration of stock solutions is determined by a dilution to 1 $\mu$ M theoretical concentration and a UV-Vis spectra analysis at 260nm (after 5min at 90°C) using the molar extinction coefficient values provided by the manufacturer (*vide supra*).

**Preparation of the DNA structures.** All DNA structures are prepared in a Caco.K buffer, comprised of 10mM lithium cacodylate buffer (pH 7.2) plus 10mM KCl/90mM LiCl. Monomolecular structures are prepared by mixing the constitutive strand (40 $\mu$ L at 500 $\mu$ M) with lithium cacodylate buffer solution (8 $\mu$ L, 100mM, pH 7.2), plus KCl/LiCl solution (8 $\mu$ L, 100mM/900mM) and water (24 $\mu$ L). Bimolecular structures are prepared by mixing each of the two constitutive strands (40 $\mu$ L, 500 $\mu$ M) with lithium cacodylate buffer solution (16 $\mu$ L, 100mM, pH 7.2), plus KCl/LiCl solution (16 $\mu$ L, 100mM/900mM) and water (48 $\mu$ L). Trimolecular structures are prepared by mixing each of the three constitutive strands (20 $\mu$ L, 1000 $\mu$ M) with lithium cacodylate buffer solution (12 $\mu$ L, 100mM, pH 7.2), plus KCl/LiCl solution

(12 $\mu$ L, 100mM/900mM) and water (36 $\mu$ L). Tetramolecular structures are prepared by mixing each of the four constitutive strands (20 $\mu$ L, 1000 $\mu$ M) with lithium cacodylate buffer solution (32 $\mu$ L, 100mM, pH 7.2), plus KCl/LiCl solution (32 $\mu$ L, 100mM/900mM) and water (96 $\mu$ L). The final concentrations are theoretically of 250, 125, 166.7 and 83.3 $\mu$ M for mono-, bi-, tri- and tetra-molecular DNA structures respectively. The actual concentration of each DNA is determined via a dilution to 1 $\mu$ M theoretical concentration (expressed in motif concentration) for monomolecular structure (i.e. 4 $\mu$ L in 996 $\mu$ L water), at 1 $\mu$ M for bimolecular structure (i.e. 8 $\mu$ L in 992 $\mu$ L water), at 0.4 $\mu$ M for trimolecular structure (i.e. 2.4 $\mu$ L in 997.6 $\mu$ L water) and at 0.2 $\mu$ M for tetramolecular structure (i.e. 2.4 $\mu$ L in 997.6 $\mu$ L water), via UV-Vis spectra analysis at 260nm (after 5min at 90°C, baseline correction at 390nm), using the following molar extinction coefficient values: 435500 (*fam*-TWJ-*tamra*), 258900 (*fam*-DS-*tamra*); 268300 (*fam*-GQ-*tamra*); 506400 (ds26); 271600 (TG5T); 385800 (PAGE TWJ); and 382200 M<sup>-1</sup>.cm<sup>-1</sup> (CD-melting TWJ).

**Folding of the higher-order DNA structures.** The high-order DNA structures were folded according to two distinct procedures: i- for the intramolecular architectures, the solutions are heated at 90°C for 5min, cooled in ice for 7h, and then stored at least overnight at 4°C; ii- for the folding of all other structures, the solutions are heated at 90°C for 5min, cooled at 80°C for 10min, 60°C for 30min, 40°C for 30min, 25°C for 4h and then stored at least overnight at 4°C.

### Part 3. FRET-melting experiments.

Experiments were performed in a 96-well format using a Mx3005P qPCR machine (Agilent) equipped with a FAM filter ( $\lambda_{ex}$  = 492nm;  $\lambda_{em}$  = 516nm). Dose-response experiments were carried out in 100 $\mu$ L (final volume) of 10mM lithium cacodylate buffer (pH 7.2) + 99mM LiCl/1mM KCl (except for *fam*-DS-*tamra* and *fam*-GQ-*tamra*: 90mM LiCl/10mM KCl), with 0.2 $\mu$ M of labeled DNA and increasing amounts (0 to 5equiv.) of cryptands/TACN-Q (0 to 1 $\mu$ M). Competitive experiments were carried out in 100 $\mu$ L (final volume) of 10mM lithium cacodylate buffer (pH 7.2) + 99mM LiCl/1mM KCl, with labeled DNA (0.2 $\mu$ M), cryptands/TACN-Q (1.0 $\mu$ M) and increasing amounts (0, 15 and 50equiv.) of unlabeled competitors (ds26 or TG5T). After a first equilibration step (25°C, 30s), a stepwise increase of 1°C every 30s for 65 cycles to reach 90°C was performed, and measurements were made after each cycle. Final data were analyzed with Excel (Microsoft Corp.) and OriginPro®8 (OriginLab Corp.). The emission of *fam* was normalized (0 to 1), and  $T_{1/2}$  was defined as the temperature for which the normalized emission is 0.5;  $\Delta T_{1/2}$  values are means of 2 to 4 experiments.

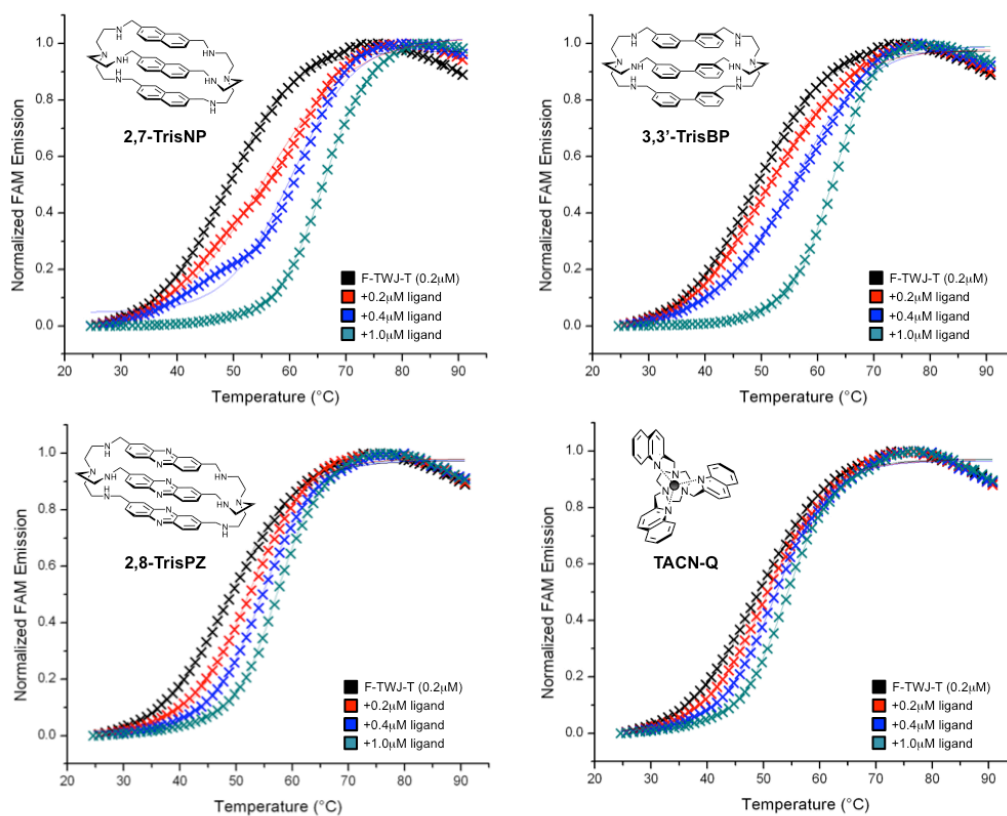

FRET-melting results of experiments carried out with *fam*-TWJ-*tamra* and increasing amounts of ligands

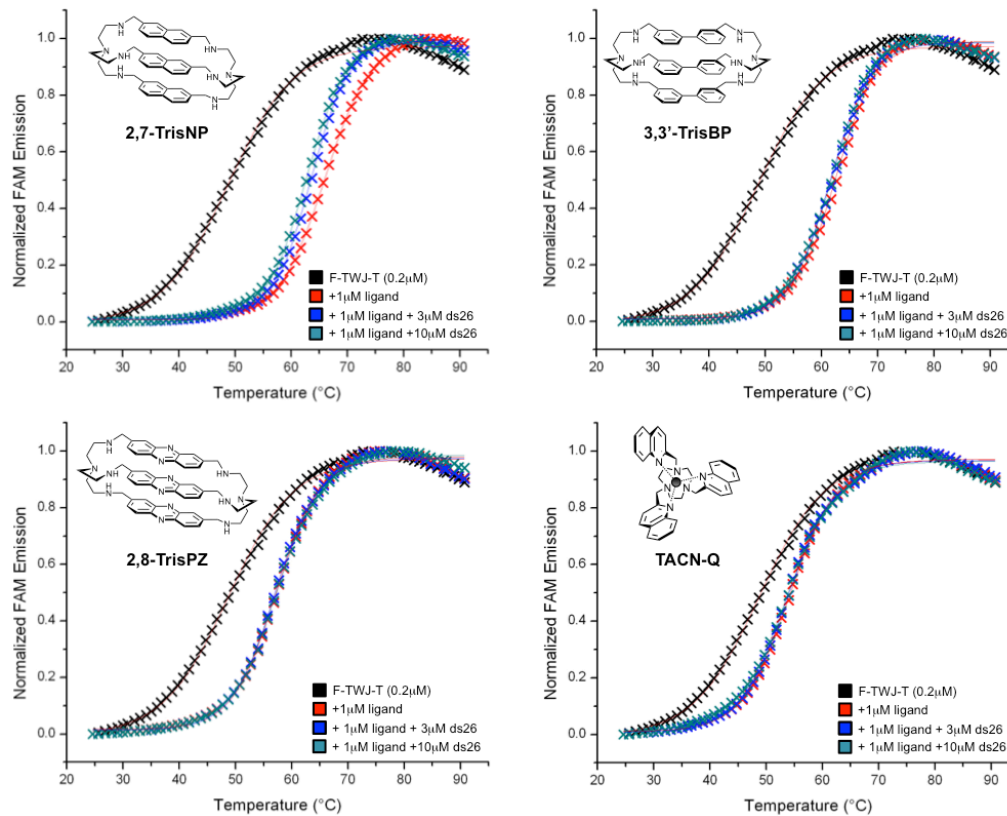

FRET-melting results of experiments carried out with *fam*-TWJ-*tamra*, 5 equiv. of ligands and increasing amounts of a duplex-DNA competitor (ds26)

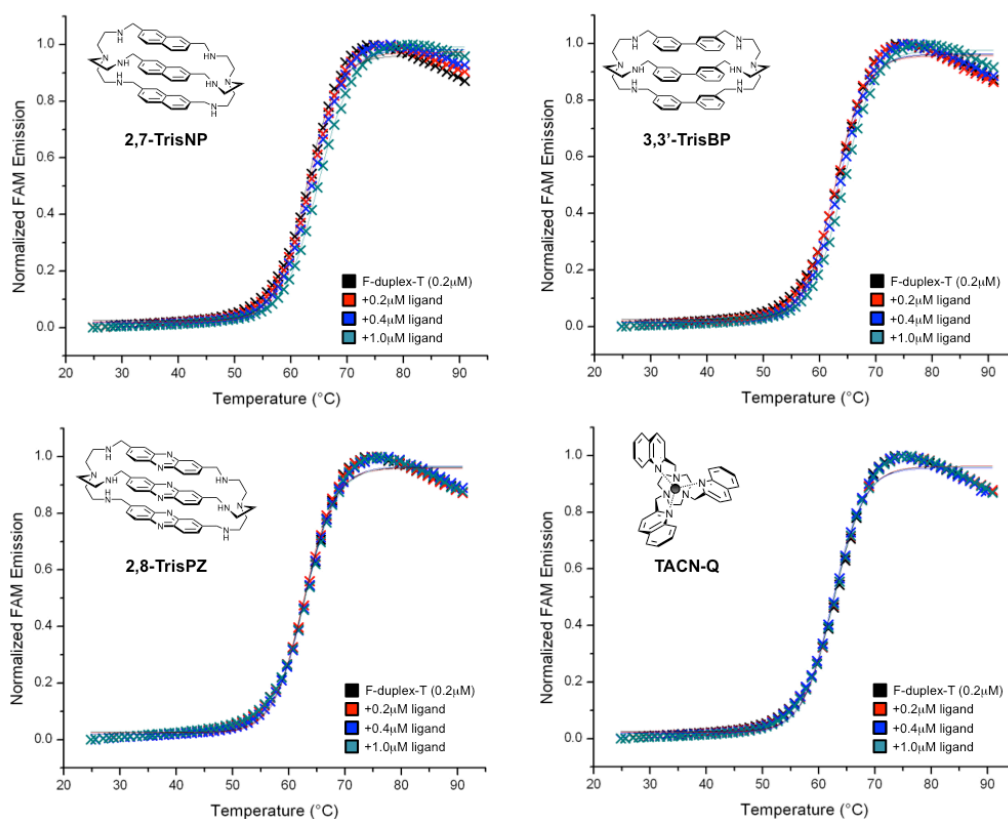

FRET-melting results of experiments carried out with *fam*-DS-*tamra* and increasing amounts of ligands

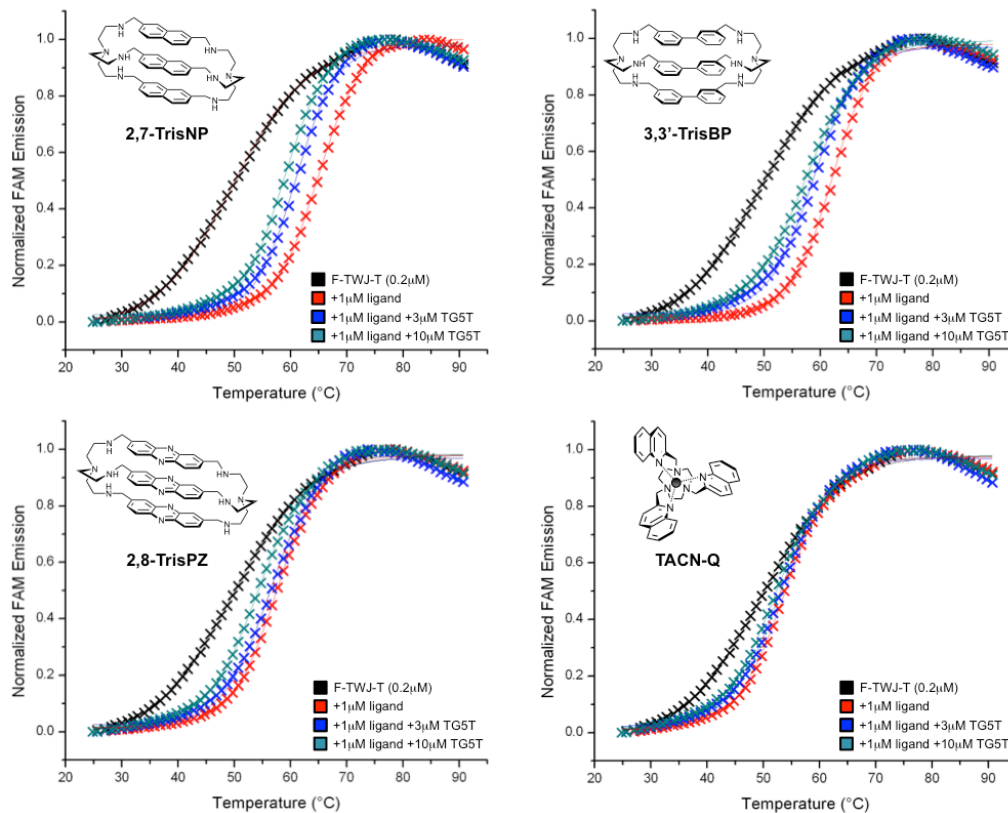

FRET-melting results of experiments carried out with *fam*-TWJ-*tamra*, 5 equiv. of ligands and increasing amounts of a quadruplex-DNA competitor (TG5T)

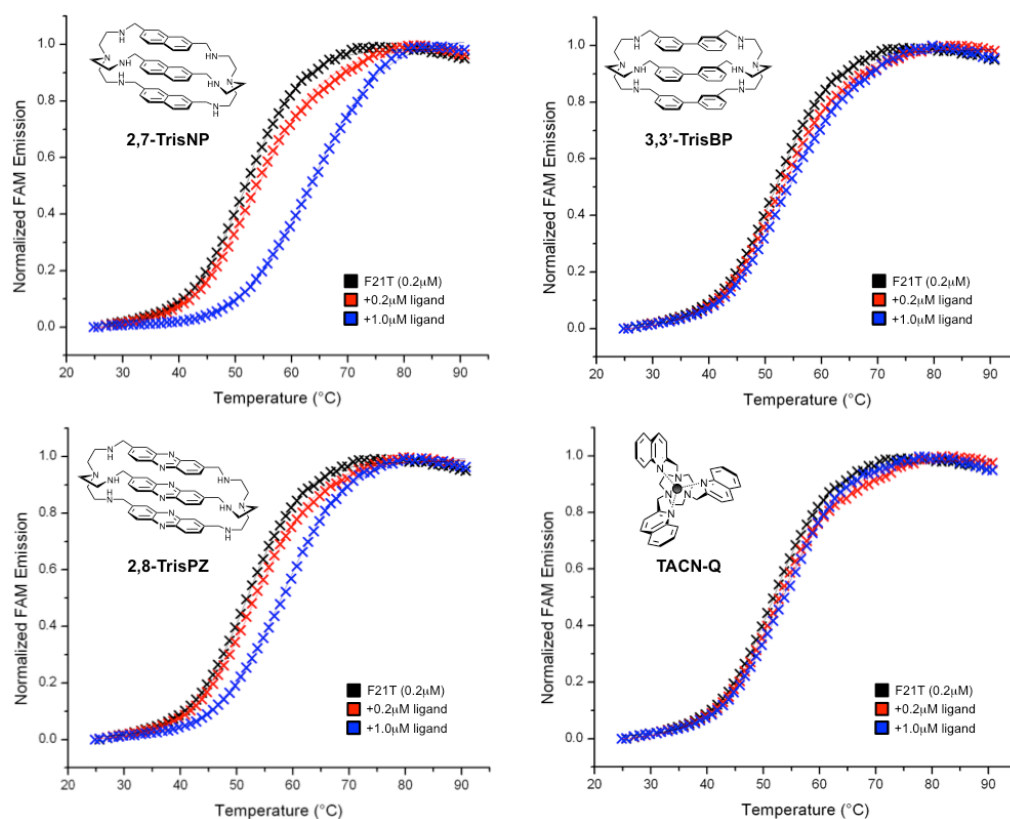

FRET-melting results of experiments carried out with *fam*-GQ-*tamra* (F21T) and increasing amounts of ligands

#### Part 4. Gel electrophoresis.

Nondenaturing polyacrylamide gel electrophoresis was carried out with 20% polyacrylamide-bisacrylamide (19:1) gel. Samples were prepared in 15 μL (final volume) of 1×TB buffer + 10mM MgCl<sub>2</sub>, with DNA (5 μM) and cryptands, TACN-Q, AuTMX<sub>2</sub>, <sup>PNA</sup>DOTASQ or TMPyP<sub>4</sub> (1equiv.). Alternatively, samples were prepared in 15 μL (volume) of 1×TB buffer + 10mM MgCl<sub>2</sub> with DNA (5 μM) and increasing amounts of either 3,3'-TrisBP or 2,8-TrisPZ (0 to 10equiv.). Loading samples were prepared mixing 5 μL of the previously prepared DNA samples (±ligands) and 10 μL of sucrose (15% in H<sub>2</sub>O; w/v), thus corresponding to a final DNA concentration of 5 μM; 10 μL of this mixture were thus loaded on the gel. The electrophoretic migration were performed in 1×TB (tris-borate buffer), pH 8.3, for 2.5hr at 4°C (180V). After the migration, gels were analyzed after a post-staining step (SYBR® Safe solution, 1:10000, 10mn, 25°C under gentle agitation) with a UVP MultiDoc-It® imaging system ( $\lambda_{ex}$  = 254nm).

#### Part 5. Circular dichroism & UV spectroscopies.

**CD titrations.** CD and UV-Vis spectra were recorded on a JASCO J-815 spectropolarimeter and a JASCO V630Bio spectrophotometer, respectively, in a 10mm path-length quartz semi-micro cuvette (Starna). CD spectra of TWJ (1 μM) were recorded over a range of 210-320nm (bandwidth = 1nm, 1nm data pitch, 1s response, scan speed = 100nm.mn<sup>-1</sup>, averaged over 5 scans, zeroed at 320nm) without

and with cryptands/TACN-Q (1, 2 and 5  $\mu$ M in H<sub>2</sub>O) in 0.5mL (final volume) of 10mM lithium cacodylate buffer (pH 7.2). UV spectra were recorded as a function of the ligands concentration (0 to 5  $\mu$ M), in 10mM lithium cacodylate buffer (pH 7.2)

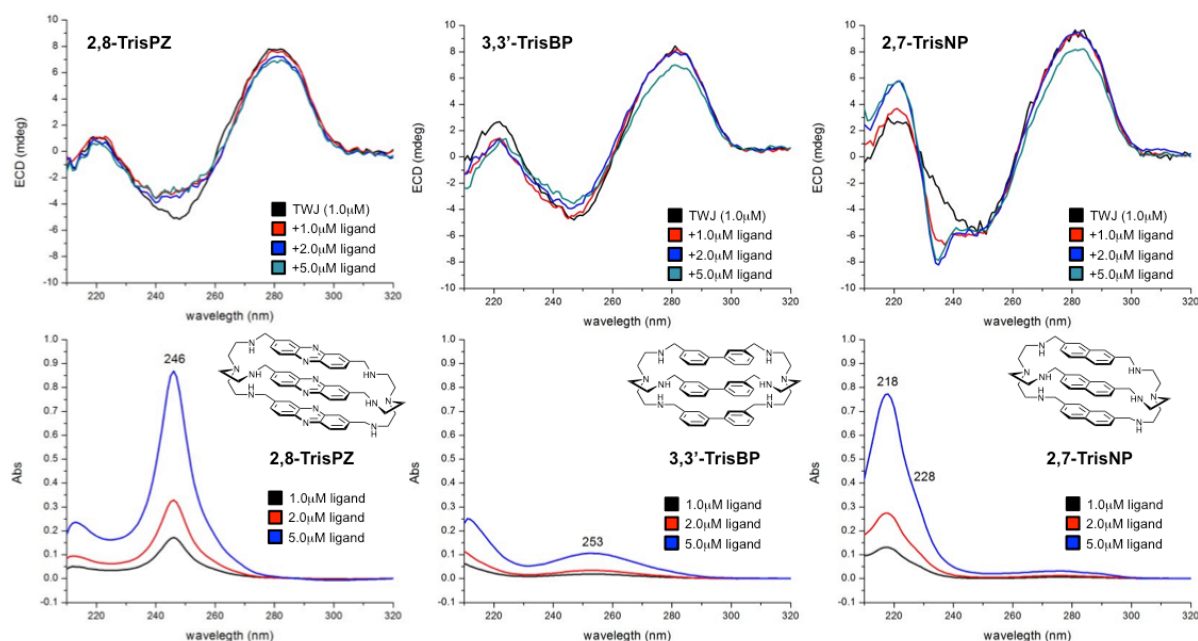

Upper panel: CD spectra of TWJ without or with increasing amounts of ligands; lower panel: and UV-Vis spectra of corresponding concentrations of ligands.

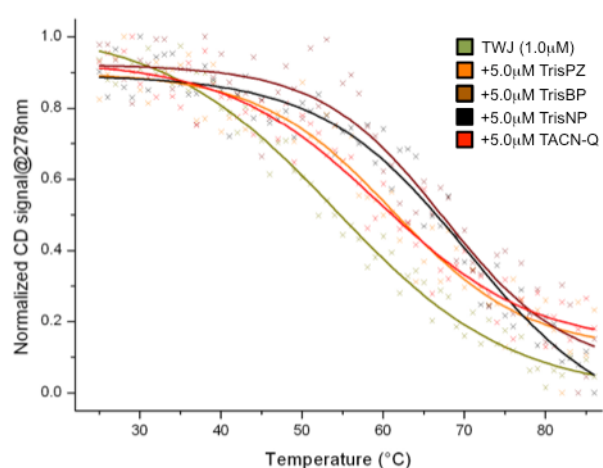

**CD-melting experiments.** CD-melting experiments carried out with TWJ (1  $\mu$ M) was performed recording the CD signal at 278nm (the positive maximum of each CD spectrum) as a function of the temperature (from 25 to 85°C, bandwidth = 1nm, 1°C data pitch, 1s response). Experiments were carried without and with cryptands/TACN-Q (5  $\mu$ M) in 600  $\mu$ L (final volume) of 10mM lithium cacodylate buffer (pH 7.2).

## Part 6. Fluorescence and FID experiments.

**TO-PRO-3 titrations.** To better assess the interaction(s) that take(s) place between three-way DNA junction and the fluorescent dye TO-PRO-3 (Life Technologies), a first row of titration was performed, monitoring the evolution of the dye fluorescence as a function of its concentration in presence of a



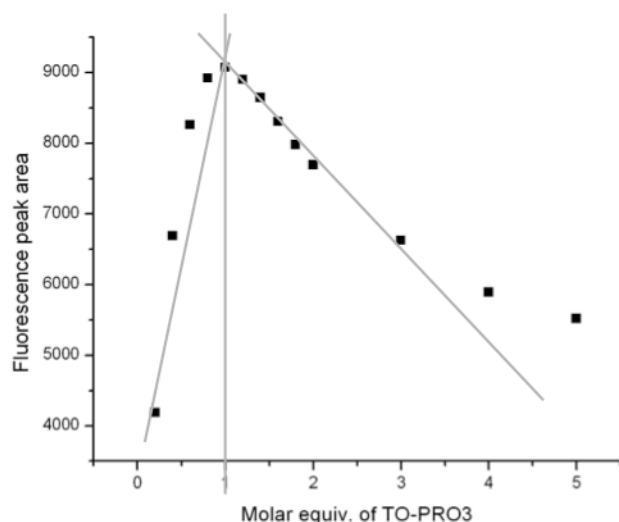

fixed DNA concentration. To this end, a solution of TWJ (1 $\mu$ M) in 10mM lithium cacodylate buffer (pH 7.2) was added of increasing concentration (from 0 to 5 $\mu$ M) of TO-PRO-3 (1mM solution in DMSO); after a short equilibration time at 25°C (5-10min), the fluorescence spectra were recorded ( $\lambda_{\text{ex}}$  = 642nm,  $\lambda_{\text{em}}$  = 650-750nm). The fluorescence peak area was subsequently plotted as a function of the TO-PRO-3 molar

equivalents; as seen in the figure on the left, the fluorescence intensity increases up to 1:1 dye:DNA ratio, is maximum at 1:1 ratio sharp, and progressively decreases at higher dye:DNA ratio (presumably due to the aggregation that originates in the self-association of free TO-PRO-3 in solution). This result clearly indicates that TWJ offers a unique, privileged binding site, presumably the cavity in light of previous reports dealing with cyanine dyes/three-way junction recognition (cf. M. N. Stojanovic & D. W. Landry, *J. Am. Chem. Soc.*, **2002**, 124, 9678).

**FID experiments.** Fluorescence Intercalator Displacement assays were performed on a JASCO FP-8500

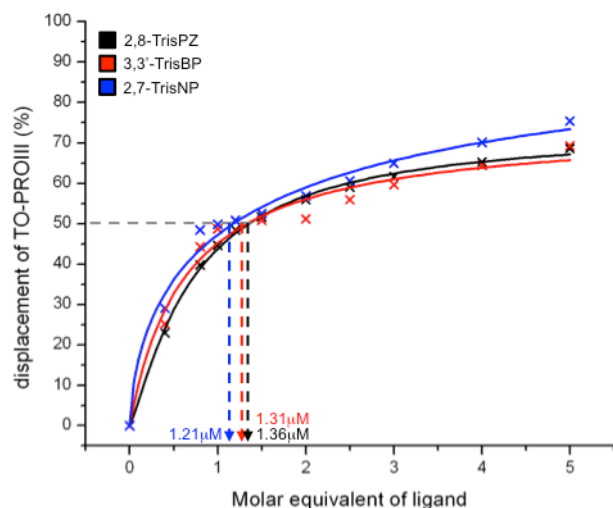

spectrofluorometer with TWJ (1 $\mu$ M) and TO-PRO-3 (1 $\mu$ M) in 1mL of 10mM lithium cacodylate buffer (pH 7.2). After a stabilization step (5-10min), the solutions were excited at 642nm and emission spectra were recorded between 650 and 750nm. Afterwards, ligands (2mM solution in water) were progressively added (from 0 to 5 $\mu$ M, *i.e.*, 0.4, 0.8, 1.0, 1.2, 1.5, 2.0, 2.5, 3.0, 4.0 and 5.0 $\mu$ M) and emissions were measured after fluorescence stabilization

(5-10min at 25°C). The percentages of displacement were calculated from the variation of fluorescence area (FA) between 650-750nm, using: TO-PRO-3 displacement (%) = 100 - [(FA/FA<sub>0</sub>) x 100], with FA<sub>0</sub> as the maximum fluorescence of TO-PRO-3 (bound to DNA and without ligand). The TO-PRO-3 displacement (%) was then plotted as a function of the concentration of added ligands.

## **Part 7. Cell culture and cell viability assay (MTT assay).**

**Cell culture.** Briefly, the adherent B16 cell line was routinely cultured in 100x20mm tissue culture dish (Falcon) at 37°C in a humidified, 5% CO<sub>2</sub> atmosphere in Roswell Park Memorial Institute medium (RPMI 1640 (1X) Gibco) supplemented with 10% fetal bovine serum (FBS, Gibco) and 1% Penicillin-Streptomycin (Pen-Strep, 5.0u.mL<sup>-1</sup> Pen/5.0µg.mL<sup>-1</sup> Strep, Gibco) mixture. Cells were subcultured twice weekly using a standard protocol: the medium was first removed by aspiration; the cells were subsequently washed once with Dulbecco's Phosphate Buffered Saline (DPBS) and 1.5mL of a trypsin-EDTA solution (0.25%, Gibco) was added. After 5min at 37°C, cells were manually harvested and 500µL of the solution of cells in suspension was dispensed into three tissue culture dishes containing 10mL of RPMI medium (with 10% FBS and 1% Pen-Strep).

**MTT assay.** Cells were firstly subcultured for 24hrs into a 96-well plate (Microtest™ 96, Falcon) prior to incubation with compounds. Stock solutions of each compound (2mM in H<sub>2</sub>O) were firstly diluted in RPMI medium (with 10% FBS and 1% Pen-Strep) to 100µM final solutions. A two-fold serial dilution protocol (in a 1mL final volume) thus offered 8 concentrations (100, 50, 25, 12.5, 6.25, 3.12, 1.56 and 0.78µM) for each compound. Cells were subsequently incubated in presence of increasing concentrations (0 to 100µM) of ligands (2,7-TrisNP, 3,3'-TrisBP, 2,8-TrisPZ and TACN-Q), with 10 wells per line (8 different concentrations plus 2 control wells with RPMI buffer only), and 2 (duplicate) to 4 lines (quadruplicate) per compounds. After 48hrs, the medium was removed, cells were washed once with DPBS, and then incubated for 1hr at 37°C in a freshly prepared 2mg.mL<sup>-1</sup> solution of MTT (3-(4,5-dimethylthiazolyl-2)-2,5-diphenyl-tetrazolium bromide, Sigma-Aldrich) in DBPS. MTT solutions were delicately pipetted off and 100µL DMSO were added in each well (to dissolve the resulting blue formazan crystals, if any); after a gentle agitation for 1hr at 25°C, the lethal concentrations (LC<sub>50</sub>) of each compound were evaluated by an optical density determination at 530nm.
